# Supplementary material for: On the Measurement of Climate Change Anxiety: French Validation of the Climate Anxiety Scale
Source: Psychol Belg. 2022 Mar 22;62(1):123–35. doi: 10.5334/pb.1137 (PMC8954884; doi:10.5334/pb.1137)
Supplement: Supplemental Tables. — Tables S1–S13. [file pb-62-1-1137-s1.pdf]

## **SUPPLEMENTARY MATERIALS**

### **On the Measurement of Climate Change Anxiety:**

#### **French Validation of the Climate Anxiety Scale**

Camille Mouguiama-Daouda<sup>1</sup>, M. Annelise Blanchard<sup>1</sup>, Charlotte Coussement<sup>1,2</sup>, &

Alexandre Heeren<sup>1,3</sup>

<sup>1</sup> Psychological Sciences Research Institute, Université Catholique de Louvain, Belgium

<sup>2</sup> Le Beau Vallon – Psychiatric Hospital, Belgium

<sup>3</sup> Institute of Neuroscience, Université Catholique de Louvain, Belgium

**Table S1. Descriptive Statistics for each item (Study 1)**

| Items | Mean | SD   | Min | Max | Range | Skewness | Kurtosis |
|-------|------|------|-----|-----|-------|----------|----------|
| CAS1  | 2.26 | 1.03 | 1   | 5   | 4     | 0.43     | -0.54    |
| CAS2  | 2.08 | 1.07 | 1   | 5   | 4     | 0.80     | -0.14    |
| CAS3  | 1.57 | 0.88 | 1   | 5   | 4     | 1.50     | 1.56     |
| CAS4  | 1.50 | 0.81 | 1   | 4   | 3     | 1.42     | 0.94     |
| CAS5  | 2.20 | 1.16 | 1   | 5   | 4     | 0.50     | -0.93    |
| CAS6  | 1.62 | 0.90 | 1   | 4   | 3     | 1.22     | 0.32     |
| CAS7  | 1.36 | 0.77 | 1   | 5   | 4     | 2.25     | 4.80     |
| CAS8  | 1.78 | 1.00 | 1   | 5   | 4     | 1.15     | 0.57     |
| CAS9  | 1.59 | 0.88 | 1   | 5   | 4     | 1.44     | 1.41     |
| CAS10 | 2.31 | 1.18 | 1   | 5   | 4     | 0.33     | -1.11    |
| CAS11 | 1.41 | 0.71 | 1   | 5   | 4     | 1.87     | 3.55     |
| CAS12 | 1.55 | 0.83 | 1   | 5   | 4     | 1.51     | 1.67     |
| CAS13 | 1.53 | 0.91 | 1   | 5   | 4     | 1.70     | 1.99     |
| CAS14 | 1.78 | 1.09 | 1   | 5   | 4     | 1.22     | 0.44     |
| CAS15 | 1.83 | 1.18 | 1   | 5   | 4     | 1.16     | 0.08     |
| CAS16 | 2.36 | 1.24 | 1   | 5   | 4     | 0.35     | -1.12    |
| CAS17 | 3.57 | 1.07 | 1   | 5   | 4     | -0.57    | -0.25    |
| CAS18 | 4.43 | 0.89 | 1   | 5   | 4     | -1.68    | 2.54     |
| CAS19 | 4.64 | 0.59 | 2   | 5   | 3     | -1.60    | 2.45     |
| CAS20 | 4.16 | 0.75 | 1   | 5   | 4     | -0.63    | 0.32     |
| CAS21 | 3.84 | 1.08 | 1   | 5   | 4     | -0.79    | 0.01     |
| CAS22 | 3.56 | 1.13 | 1   | 5   | 4     | -0.28    | -0.87    |

**Table S2. Factor Loadings for the 4-Factor Model (Study1)**

| Items                                                                                                                                     | CEI<br>Factor | FI<br>Factor | EX<br>Factor | BE<br>Factor |
|-------------------------------------------------------------------------------------------------------------------------------------------|---------------|--------------|--------------|--------------|
| Il m'est difficile de me concentrer lorsque je pense au changement climatique (item 1)                                                    | .69           |              |              |              |
| Il m'est difficile de m'endormir lorsque je pense au changement climatique (item2).                                                       | .75           |              |              |              |
| Je fais des cauchemars à propos du changement climatique (item 3).                                                                        | .69           |              |              |              |
| Je me retrouve à pleurer à cause du changement climatique (item 4).                                                                       | .69           |              |              |              |
| Je me demande pourquoi est-ce que je n'arrive pas à mieux gérer le changement climatique (item 5).                                        | .61           |              |              |              |
| Je me mets à l'écart et pense aux raisons pour lesquelles je me sens ainsi face au changement climatique (item6).                         | .64           |              |              |              |
| J'écris mes réflexions sur le changement climatique et je les analyse (item 7).                                                           | .39           |              |              |              |
| Je me demande pourquoi je réagis ainsi au changement climatique (item 8).                                                                 | .58           |              |              |              |
| Mes préoccupations au sujet du changement climatique m'empêchent de m'amuser avec ma famille ou mes amis (item 9).                        |               | .78          |              |              |
| J'ai du mal à trouver un équilibre entre mes préoccupations pour le « durable » et les besoins de ma famille (item 10).                   |               | .53          |              |              |
| Mes préoccupations à propos du changement climatique interfèrent avec ma capacité à faire mon travail ou mes tâches scolaires (item 11).  |               | .71          |              |              |
| Mes préoccupations concernant le changement climatique impactent négativement ma capacité à exploiter pleinement mon potentiel (item 12). |               | .82          |              |              |
| Mes amis disent que je pense trop au changement climatique (item 13).                                                                     |               | .57          |              |              |
| J'ai été directement affecté par le changement climatique (item 14).                                                                      |               |              | .89          |              |
| Je connais quelqu'un qui a été directement affecté par le réchauffement climatique (item 15).                                             |               |              | .85          |              |

|                                                                                                                     |     |
|---------------------------------------------------------------------------------------------------------------------|-----|
| J'ai constaté l'altération d'un lieu important pour moi suite au changement climatique (item 16).                   | .55 |
| J'aurais aimé me comporter d'une façon plus respectueuse de l'environnement (item 17).                              | .29 |
| Je recycle (item 18).                                                                                               | .54 |
| J'éteins les lumières (item 19).                                                                                    | .43 |
| J'essaye de réduire mes comportements qui contribuent au changement climatique (item 20).                           | .60 |
| Je me sens coupable si je gaspille de l'énergie (item 21).                                                          | .55 |
| Je crois que je peux faire quelque chose pour aider à faire face au problème du réchauffement climatique (item 22). | .42 |

---

**Note.** CEI = cognitive-emotional impairments; FI = Functional impairments; EX= Personal experience of climate change; BE= Behavioral engagement.

**Table S3. Factor Loadings for the 2-Factor Model (Study 1)**

| Items                                                                                                                                     | CEI<br>Factor | FI<br>Factor |
|-------------------------------------------------------------------------------------------------------------------------------------------|---------------|--------------|
| Il m'est difficile de m'endormir lorsque je pense au changement climatique (item2).                                                       | .69<br>.76    |              |
| Je fais des cauchemars à propos du changement climatique (item 3).                                                                        | .69           |              |
| Je me retrouve à pleurer à cause du changement climatique (item 4).                                                                       | .69           |              |
| Je me demande pourquoi est-ce que je n'arrive pas à mieux gérer le changement climatique (item 5).                                        | .61           |              |
| Je me mets à l'écart et pense aux raisons pour lesquelles je me sens ainsi face au changement climatique (item6).                         | .64           |              |
| J'écris mes réflexions sur le changement climatique et je les analyse (item 7).                                                           | .39           |              |
| Je me demande pourquoi je réagis ainsi au changement climatique (item 8).                                                                 | .57           |              |
| Mes préoccupations au sujet du changement climatique m'empêchent de m'amuser avec ma famille ou mes amis (item 9).                        |               | .78          |
| J'ai du mal à trouver un équilibre entre mes préoccupations pour le « durable » et les besoins de ma famille (item 10).                   |               | .52          |
| Mes préoccupations à propos du changement climatique interfèrent avec ma capacité à faire mon travail ou mes tâches scolaires (item 11).  |               | .74          |
| Mes préoccupations concernant le changement climatique impactent négativement ma capacité à exploiter pleinement mon potentiel (item 12). |               | .82          |
| Mes amis disent que je pense trop au changement climatique (item 13).                                                                     |               | .57          |

**Note.** CEI = cognitive-emotional impairments; FI = Functional impairments

**Table S4. Factor Loadings for the 1-Factor Model (Study1)**

| Items                                                                                                                                     | CAS13 |
|-------------------------------------------------------------------------------------------------------------------------------------------|-------|
| Il m'est difficile de me concentrer lorsque je pense au changement climatique (item 1)                                                    | .69   |
| Il m'est difficile de m'endormir lorsque je pense au changement climatique (item2).                                                       | .73   |
| Je fais des cauchemars à propos du changement climatique (item 3).                                                                        | .68   |
| Je me retrouve à pleurer à cause du changement climatique (item 4).                                                                       | .68   |
| Je me demande pourquoi est-ce que je n'arrive pas à mieux gérer le changement climatique (item 5).                                        | .59   |
| Je me mets à l'écart et pense aux raisons pour lesquelles je me sens ainsi face au changement climatique (item6).                         | .62   |
| J'écris mes réflexions sur le changement climatique et je les analyse (item 7).                                                           | .40   |
| Je me demande pourquoi je réagis ainsi au changement climatique (item 8).                                                                 | .56   |
| Mes préoccupations au sujet du changement climatique m'empêchent de m'amuser avec ma famille ou mes amis (item 9).                        | .74   |
| J'ai du mal à trouver un équilibre entre mes préoccupations pour le « durable » et les besoins de ma famille (item 10).                   | .52   |
| Mes préoccupations à propos du changement climatique interfèrent avec ma capacité à faire mon travail ou mes tâches scolaires (item 11).  | .70   |
| Mes préoccupations concernant le changement climatique impactent négativement ma capacité à exploiter pleinement mon potentiel (item 12). | .78   |
| Mes amis disent que je pense trop au changement climatique (item 13).                                                                     | .56   |

**Table S5. Comparison of three CFA Models without item 7 (Study 1)**

| <b>Model</b>    | Satorra<br>Bentler<br>$\chi^2$ | df        | SRMR       | RMSEA      | RMSEA<br>90% CI  | CFI        | TLI        | AIC            | ECVI        |
|-----------------|--------------------------------|-----------|------------|------------|------------------|------------|------------|----------------|-------------|
| 4-Factor        | 373.72 **                      | 183       | .06        | .06        | .054–.072        | .90        | .88        | 15523.48       | 1.73        |
| <b>2-Factor</b> | <b>122.82**</b>                | <b>53</b> | <b>.04</b> | <b>.07</b> | <b>.060–.095</b> | <b>.93</b> | <b>.92</b> | <b>8472.90</b> | <b>0.72</b> |
| 1-Factor        | 160.69**                       | 54        | .05        | .09        | .078–.111        | .90        | .88        | 8520.69        | 0.87        |

**Note.** 4-Factor = four-factor model of the 22-item scale; 2-Factor = two-factor model of the 13-item scale; 1-Factor = single-factor model of the 13-item scale. df = degree of freedom; CI= confidence interval; SRMR = Standardized Root Mean Square Residual; RMSEA = Root Mean Square Error of Approximation; CFI = Comparative Fit Index; TLI = Tucker Lewis Index; AIC = Akaike Information Criterion; ECVI=Expected Cross-Validation Index. The best fitting model is shown in bold. \*\*  $p < .01$ .

**Table S6. Comparison of three CFA Models without the outliers (Study1)**

| <b>Model</b>    | Satorra<br>Bentler<br>X2 | df        | SRMR       | RMSEA      | RMSEA<br>90% CI  | CFI        | TLI        | AIC            | ECVI        |
|-----------------|--------------------------|-----------|------------|------------|------------------|------------|------------|----------------|-------------|
| 4-Factor        | 416.96 **                | 203       | .07        | .06        | .056–.073        | .87        | .86        | 15697.93       | 1.97        |
| <b>2-Factor</b> | <b>139.32**</b>          | <b>64</b> | <b>.05</b> | <b>.07</b> | <b>.057–.090</b> | <b>.91</b> | <b>.89</b> | <b>8763.53</b> | <b>0.82</b> |
| 1-Factor        | 173.30**                 | 65        | .06        | .09        | .072–.105        | .88        | .85        | 8806.06        | 0.96        |

*Note.* 4-Factor = four-factor model of the 22-item scale; 2-Factor = two-factor model of the 13-item scale; 1-Factor = single-factor model of the 13-item scale. df = degree of freedom; CI= confidence interval; SRMR = Standardized Root Mean Square Residual; RMSEA = Root Mean Square Error of Approximation; CFI = Comparative Fit Index; TLI = Tucker Lewis Index; AIC = Akaike Information Criterion; ECVI=Expected Cross-Validation Index. The best fitting model is shown in bold. \*\*  $p < .01$ .

**Table S7. Descriptive Statistics for each item (Study 2)**

| Items | Mean | SD   | Min | Max | Range | Skewness | Kurtosis |
|-------|------|------|-----|-----|-------|----------|----------|
| CAS1  | 2.53 | 1.08 | 1   | 5   | 4     | 0.13     | -0.79    |
| CAS2  | 2.35 | 1.09 | 1   | 5   | 4     | 0.36     | -0.69    |
| CAS3  | 1.52 | 0.80 | 1   | 5   | 4     | 1.44     | 1.36     |
| CAS4  | 1.59 | 0.89 | 1   | 5   | 4     | 1.34     | 0.85     |
| CAS5  | 2.51 | 1.23 | 1   | 5   | 4     | 0.22     | -1.13    |
| CAS6  | 2.06 | 1.07 | 1   | 5   | 4     | 0.68     | -0.53    |
| CAS7  | 1.63 | 0.99 | 1   | 5   | 4     | 1.45     | 1.06     |
| CAS8  | 1.96 | 1.07 | 1   | 5   | 4     | 0.81     | -0.43    |
| CAS9  | 2.21 | 1.07 | 1   | 5   | 4     | 0.45     | -0.67    |
| CAS10 | 2.86 | 1.17 | 1   | 5   | 4     | -0.14    | -0.93    |
| CAS11 | 2.01 | 1.06 | 1   | 5   | 4     | 0.78     | -0.25    |
| CAS12 | 2.02 | 1.11 | 1   | 5   | 4     | 0.82     | -0.28    |
| CAS13 | 2.20 | 1.20 | 1   | 5   | 4     | 0.61     | -0.75    |
| CAS14 | 1.97 | 1.09 | 1   | 5   | 4     | 0.88     | -0.14    |
| CAS15 | 2.08 | 1.19 | 1   | 5   | 4     | 0.77     | -0.50    |
| CAS16 | 2.60 | 1.29 | 1   | 5   | 4     | 0.23     | -1.09    |
| CAS17 | 3.51 | 1.09 | 1   | 5   | 4     | -0.45    | -0.40    |
| CAS18 | 4.54 | 0.70 | 1   | 5   | 4     | -1.56    | 2.33     |
| CAS19 | 4.61 | 0.65 | 1   | 5   | 4     | -1.71    | 2.97     |
| CAS20 | 4.31 | 0.77 | 1   | 5   | 4     | -1.12    | 1.63     |
| CAS21 | 3.94 | 1.06 | 1   | 5   | 4     | -0.80    | -0.15    |
| CAS22 | 3.66 | 1.14 | 1   | 5   | 4     | -0.47    | -0.64    |

**Table S8. Factor Loadings for the 4-Factor Model (Study 2)**

| Items                                                                                                                                     | CEI<br>Factor | FI<br>Factor | EX<br>Factor | BE<br>Factor |
|-------------------------------------------------------------------------------------------------------------------------------------------|---------------|--------------|--------------|--------------|
| Il m'est difficile de me concentrer lorsque je pense au changement climatique (item 1)                                                    | .69           |              |              |              |
| Il m'est difficile de m'endormir lorsque je pense au changement climatique (item2).                                                       | .69           |              |              |              |
| Je fais des cauchemars à propos du changement climatique (item 3).                                                                        | .50           |              |              |              |
| Je me retrouve à pleurer à cause du changement climatique (item 4).                                                                       | .54           |              |              |              |
| Je me demande pourquoi est-ce que je n'arrive pas à mieux gérer le changement climatique (item 5).                                        | .59           |              |              |              |
| Je me mets à l'écart et pense aux raisons pour lesquelles je me sens ainsi face au changement climatique (item6).                         | .68           |              |              |              |
| J'écris mes réflexions sur le changement climatique et je les analyse (item 7).                                                           | .31           |              |              |              |
| Je me demande pourquoi je réagis ainsi au changement climatique (item 8).                                                                 | .49           |              |              |              |
| Mes préoccupations au sujet du changement climatique m'empêchent de m'amuser avec ma famille ou mes amis (item 9).                        |               | .76          |              |              |
| J'ai du mal à trouver un équilibre entre mes préoccupations pour le « durable » et les besoins de ma famille (item 10).                   |               | .56          |              |              |
| Mes préoccupations à propos du changement climatique interfèrent avec ma capacité à faire mon travail ou mes tâches scolaires (item 11).  |               | .77          |              |              |
| Mes préoccupations concernant le changement climatique impactent négativement ma capacité à exploiter pleinement mon potentiel (item 12). |               | .74          |              |              |
| Mes amis disent que je pense trop au changement climatique (item 13).                                                                     |               | .60          |              |              |
| J'ai été directement affecté par le changement climatique (item 14).                                                                      |               |              | .83          |              |
| Je connais quelqu'un qui a été directement affecté par le réchauffement climatique (item 15).                                             |               |              | .85          |              |

|                                                                                                                     |     |
|---------------------------------------------------------------------------------------------------------------------|-----|
| J'ai constaté l'altération d'un lieu important pour moi suite au changement climatique (item 16).                   | .50 |
| J'aurais aimé me comporter d'une façon plus respectueuse de l'environnement (item 17).                              | .30 |
| Je recycle (item 18).                                                                                               | .49 |
| J'éteins les lumières (item 19).                                                                                    | .43 |
| J'essaye de réduire mes comportements qui contribuent au changement climatique (item 20).                           | .66 |
| Je me sens coupable si je gaspille de l'énergie (item 21).                                                          | .65 |
| Je crois que je peux faire quelque chose pour aider à faire face au problème du réchauffement climatique (item 22). | .51 |

---

**Note.** CEI = cognitive-emotional impairments; FI = Functional impairments; EX= Personal experience of climate change; BE= Behavioral Engagement.

**Table S9. Factor Loadings for the 2-Factor Model (study 2)**

| Items                                                                                                                                     | CEI<br>Factor | FI<br>Factor |
|-------------------------------------------------------------------------------------------------------------------------------------------|---------------|--------------|
|                                                                                                                                           | .69           |              |
| Il m'est difficile de m'endormir lorsque je pense au changement climatique (item2).                                                       | .68           |              |
| Je fais des cauchemars à propos du changement climatique (item 3).                                                                        | .49           |              |
| Je me retrouve à pleurer à cause du changement climatique (item 4).                                                                       | .53           |              |
| Je me demande pourquoi est-ce que je n'arrive pas à mieux gérer le changement climatique (item 5).                                        | .59           |              |
| Je me mets à l'écart et pense aux raisons pour lesquelles je me sens ainsi face au changement climatique (item6).                         | .68           |              |
| J'écris mes réflexions sur le changement climatique et je les analyse (item 7).                                                           | .31           |              |
| Je me demande pourquoi je réagis ainsi au changement climatique (item 8).                                                                 | .50           |              |
| Mes préoccupations au sujet du changement climatique m'empêchent de m'amuser avec ma famille ou mes amis (item 9).                        |               | .76          |
| J'ai du mal à trouver un équilibre entre mes préoccupations pour le « durable » et les besoins de ma famille (item 10).                   |               | .56          |
| Mes préoccupations à propos du changement climatique interfèrent avec ma capacité à faire mon travail ou mes tâches scolaires (item 11).  |               | .77          |
| Mes préoccupations concernant le changement climatique impactent négativement ma capacité à exploiter pleinement mon potentiel (item 12). |               | .75          |
| Mes amis disent que je pense trop au changement climatique (item 13).                                                                     |               | .59          |

**Note.** CEI = cognitive-emotional impairments; FI = Functional impairments

**Table S10. Factor Loadings for the 1-Factor Model (Study2)**

| Items                                                                                                                                     | CAS13 |
|-------------------------------------------------------------------------------------------------------------------------------------------|-------|
| Il m'est difficile de me concentrer lorsque je pense au changement climatique (item 1)                                                    | .65   |
| Il m'est difficile de m'endormir lorsque je pense au changement climatique (item2).                                                       | .62   |
| Je fais des cauchemars à propos du changement climatique (item 3).                                                                        | .44   |
| Je me retrouve à pleurer à cause du changement climatique (item 4).                                                                       | .48   |
| Je me demande pourquoi est-ce que je n'arrive pas à mieux gérer le changement climatique (item 5).                                        | .56   |
| Je me mets à l'écart et pense aux raisons pour lesquelles je me sens ainsi face au changement climatique (item6).                         | .67   |
| J'écris mes réflexions sur le changement climatique et je les analyse (item 7).                                                           | .32   |
| Je me demande pourquoi je réagis ainsi au changement climatique (item 8).                                                                 | .48   |
| Mes préoccupations au sujet du changement climatique m'empêchent de m'amuser avec ma famille ou mes amis (item 9).                        | .72   |
| J'ai du mal à trouver un équilibre entre mes préoccupations pour le « durable » et les besoins de ma famille (item 10).                   | .54   |
| Mes préoccupations à propos du changement climatique interfèrent avec ma capacité à faire mon travail ou mes tâches scolaires (item 11).  | .72   |
| Mes préoccupations concernant le changement climatique impactent négativement ma capacité à exploiter pleinement mon potentiel (item 12). | .71   |
| Mes amis disent que je pense trop au changement climatique (item 13).                                                                     | .59   |

**Table S11. Comparison of three CFA Models without item 7 (Study 2)**

| <b>Model</b>    | Satorra<br>Bentler<br>$\chi^2$ | df        | SRMR       | RMSEA      | RMSEA<br>90% CI  | CFI        | TLI        | AIC             | ECVI        |
|-----------------|--------------------------------|-----------|------------|------------|------------------|------------|------------|-----------------|-------------|
| 4-Factor        | 896.56 **                      | 183       | .07        | .06        | .064–.074        | .86        | .84        | 49605.67        | 1.19        |
| <b>2-Factor</b> | <b>345.62**</b>                | <b>53</b> | <b>.05</b> | <b>.87</b> | <b>.079–.096</b> | <b>.90</b> | <b>.88</b> | <b>28689.19</b> | <b>0.53</b> |
| 1-Factor        | 502.69**                       | 54        | .06        | .10        | .099–.103        | .85        | .82        | 28884.04        | 0.75        |

**Note.** 4-Factor = four-factor model of the 22-item scale; 2-Factor = two-factor model of the 13-item scale; 1-Factor = single-factor model of the 13-item scale. df = degree of freedom; CI= confidence interval; SRMR = Standardized Root Mean Square Residual; RMSEA = Root Mean Square Error of Approximation; CFI = Comparative Fit Index; TLI = Tucker Lewis Index; AIC = Akaike Information Criterion; ECVI=Expected Cross-Validation Index. The best fitting model is shown in bold. \*\* $p < .01$ .

**Table S12. Comparison of three CFA Models without the outliers (Study2)**

| <b>Model</b>    | Satorra<br>Bentler<br>$\chi^2_2$ | df        | SRMR       | RMSEA      | RMSEA<br>90% CI  | CFI        | TLI        | AIC             | ECVI        |
|-----------------|----------------------------------|-----------|------------|------------|------------------|------------|------------|-----------------|-------------|
| 4-Factor        | 952.34 **                        | 203       | .07        | .06        | .063–.072        | .86        | .84        | 51724.77        | 1.28        |
| <b>2-Factor</b> | <b>387.14**</b>                  | <b>64</b> | <b>.05</b> | <b>.08</b> | <b>.076–.092</b> | <b>.90</b> | <b>.87</b> | <b>30851.04</b> | <b>0.60</b> |
| 1-Factor        | 538.93**                         | 65        | .06        | .10        | .093–.109        | .84        | .80        | 31031.18        | 0.80        |

**Note.** 4-Factor = four-factor model of the 22-item scale; 2-Factor = two-factor model of the 13-item scale; 1-Factor = single-factor model of the 13-item scale. df = degree of freedom; CI= confidence interval; SRMR = Standardized Root Mean Square Residual; RMSEA = Root Mean Square Error of Approximation; CFI = Comparative Fit Index; TLI = Tucker Lewis Index; AIC = Akaike Information Criterion; ECVI=Expected Cross-Validation Index. The best fitting model is shown in bold. \*\* $p < .01$ .

**Table S13. Correlations between the Climate Change Anxiety subscales (Study 2)**

|                     | CEI (Factor 1)  | FI (Factor 2)   |
|---------------------|-----------------|-----------------|
| CAS (13-item total) | .93** [.92–.94] | .89** [.87–.90] |
| CEI (Factor 1)      |                 | .66** [.63–.70] |
| FI (Factor 2)       | .66** [.63–.70] |                 |
| PE (Factor 3)       | .28** [.22–.34] | .27** [.21–.33] |
| BE (Factor 4)       | .37** [.31–.42] | .33** [.27–.3]  |

**Note.** CEI = cognitive-emotional impairments; FI = Functional impairments; EX= Personal experience of climate change; BE= Behavioral Engagement; BDI = Beck depression inventory. GAD =general anxiety disorders; EID= environmental identity; CAS = climate anxiety scale. \* $p < .05$  (corrected for multiple comparison using the Benjamini-Hochberg procedure).
